# Supplementary material
Source: PubMed Central journal article supplement (PMC4198420)

Table of contents entry:

We show that the kinesin motor surface density affects the size distribution and density of self-assembled microtubule spools, indicating that spools are the result of forces which motors impart on gliding microtubules.

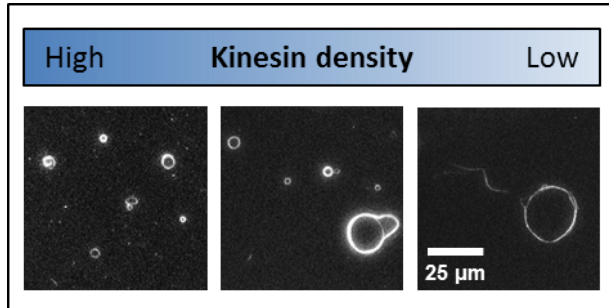

Supplement: NIHMS631154-supplement-Graphical_Abstract.pdf [file NIHMS631154-supplement-Graphical_Abstract.pdf]
